# Supplementary material for: A Raman spectroscopic investigation of speciation in La2(SO4)3(aq)
Source: Royal Society of Chemistry journal article supplement (doi:10.1039/c5ra16900c), 2015-01-01
Supplement: c5ra16900c1.pdf [file c5ra16900c1.pdf]

## Supplementary Material

Wolfram W. Rudolph and Gert Irmer: A Raman spectroscopic investigation of speciation in  $\text{La}_2(\text{SO}_4)_3(\text{aq})$ .

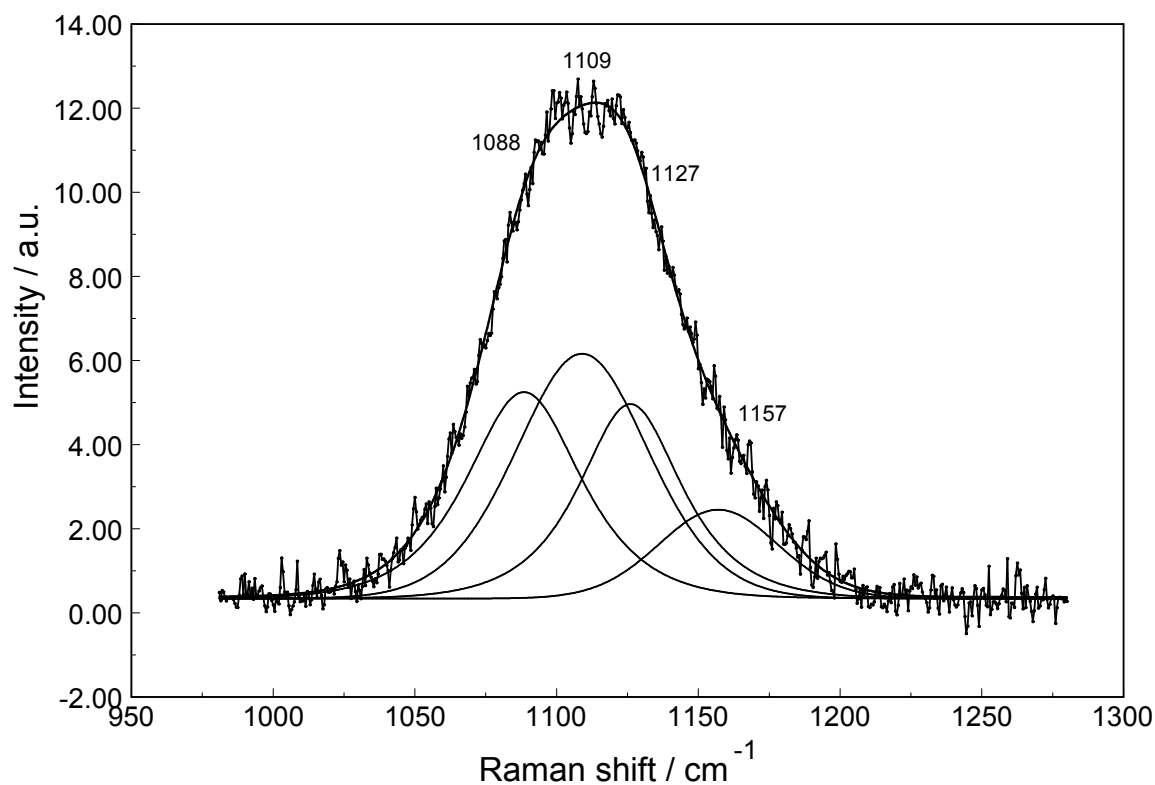

**Figure S1.** Anisotropic Raman spectrum of the  $\nu_3 \text{SO}_4^{2-}$  band profile of an aqueous  $0.0376 \text{ molL}^{-1} \text{La}_2(\text{SO}_4)_3$ . The measured anisotropic band contour, the sum curve and the band components of the band fit are shown. In addition the peak positions of the band components are given.

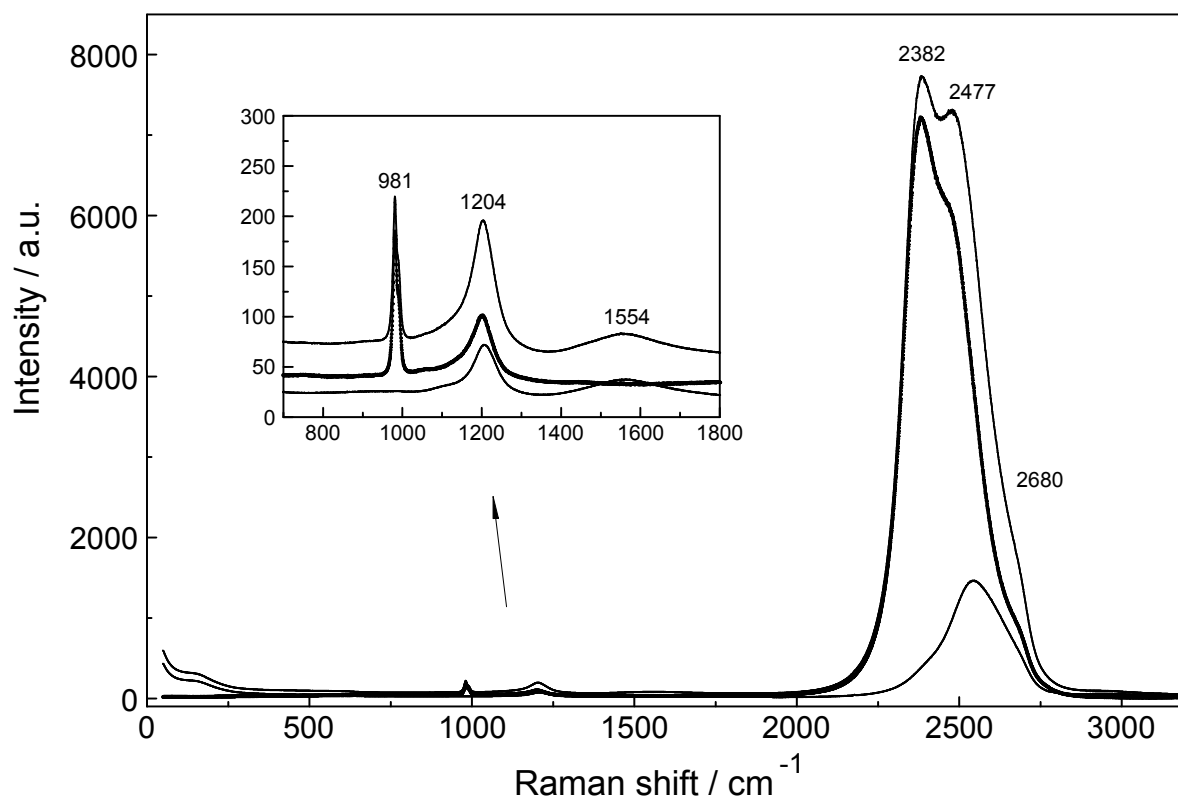

**Figure S2.** Overview Raman spectrum of a  $\text{La}_2(\text{SO}_4)_3$  solution in heavy water from 50 – 3200  $\text{cm}^{-1}$ . The solvent spectrum, the spectrum of  $\text{D}_2\text{O}$  dominates and the  $\text{D}_2\text{O}(\text{l})$  bands are assigned to the restricted translation band at 168  $\text{cm}^{-1}$ , the librational bands between 300 and 900  $\text{cm}^{-1}$ , the deformation mode  $\nu_2(\text{DOD})$  at 1204  $\text{cm}^{-1}$  (note the Raman non-coincidence effect of the band) and the O-D stretching profile with the double band at 2382 and 2477  $\text{cm}^{-1}$  as well as the shoulder at 2680  $\text{cm}^{-1}$ . The inset shows the wavenumber range from 700 – 1800  $\text{cm}^{-1}$  in greater detail. The band profile of  $\nu_1\text{SO}_4^{2-}$  shows two band components at 981  $\text{cm}^{-1}$  assigned to the “free”, uncoordinated sulfate and at 991  $\text{cm}^{-1}$  for “bound” sulfate. The bands at 1204  $\text{cm}^{-1}$  and 1550  $\text{cm}^{-1}$  are due to the solvent  $\text{D}_2\text{O}$ . The band at 1204  $\text{cm}^{-1}$  represents the deformation mode,  $\nu_2(\text{DOD})$  and the band at 1554  $\text{cm}^{-1}$  a combination band of  $\nu_2(\text{DOD})$  with a librational mode,  $\nu_2 + \nu_{\text{L}}$ .

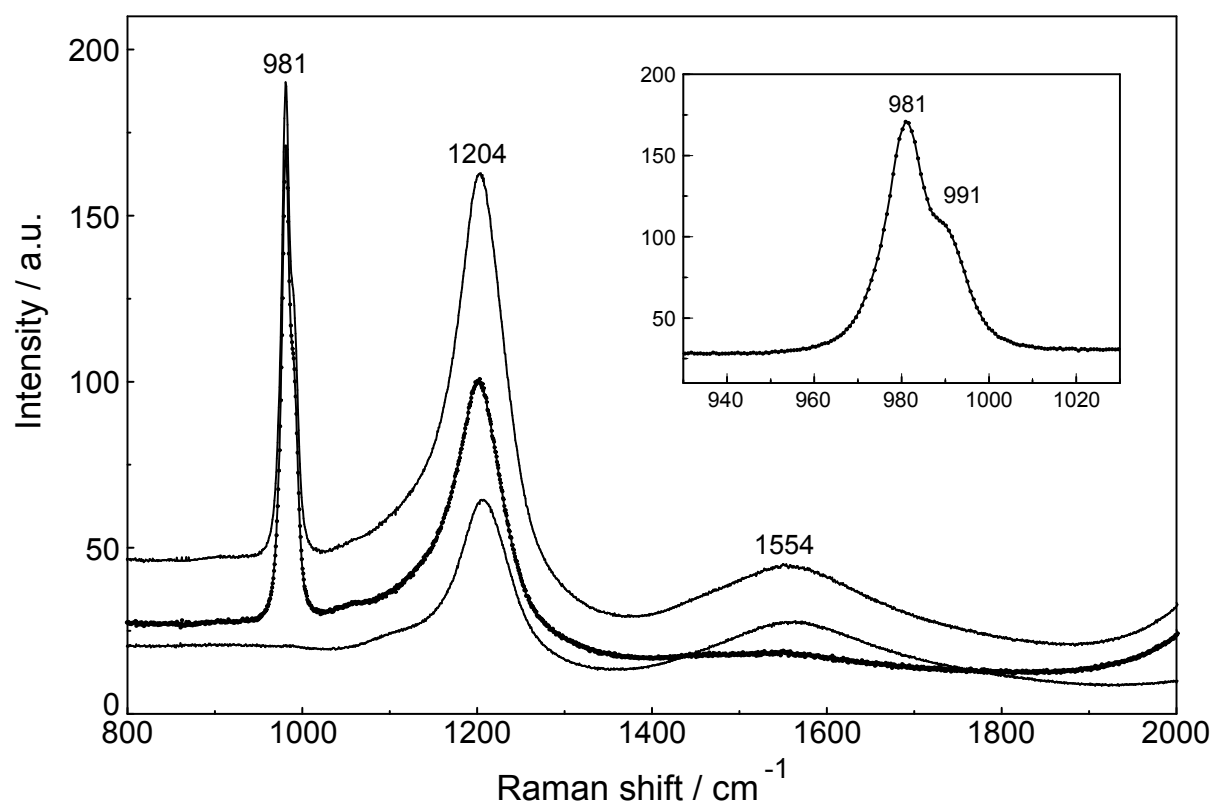

**Figure S3.** Raman spectrum of a  $\text{La}_2(\text{SO}_4)_3$  solution in heavy water from 800 – 2000  $\text{cm}^{-1}$ . The band profile of  $\nu_1\text{SO}_4^{2-}$  shows two band components at 981  $\text{cm}^{-1}$  assigned to the “free”, uncoordinated sulfate and at 991  $\text{cm}^{-1}$  for “bound” sulfate of the  $\text{La}^{3+}$ -sulfato-complex,  $[\text{La}(\text{OD}_2)_8\text{OSO}_3]^+$ . The bands at 1204  $\text{cm}^{-1}$  and 1554  $\text{cm}^{-1}$  are due to the solvent  $\text{D}_2\text{O}$  (see Figure S1). The inset shows the  $\nu_1\text{SO}_4^{2-}$  band profile in greater detail.

**Table S1.** Raman data on  $\text{La}_2(\text{SO}_4)_3$  solution as a function of dilution at 23 °C. Band parameters of the two-component fit of the  $\nu_1\text{-SO}_4^{2-}$  band profile for the component bands at 980  $\text{cm}^{-1}$  and 991  $\text{cm}^{-1}$ . The degree sulfato complex formation,  $\alpha$ , is also given.

| Concentration<br>/ $\text{molL}^{-1}$ | 980 $\text{cm}^{-1}$ - band  |                            |           | 991 $\text{cm}^{-1}$ - band  |                            |           | $\alpha$ |
|---------------------------------------|------------------------------|----------------------------|-----------|------------------------------|----------------------------|-----------|----------|
|                                       | $\tilde{\nu}/\text{cm}^{-1}$ | fwhh<br>/ $\text{cm}^{-1}$ | $A_{980}$ | $\tilde{\nu}/\text{cm}^{-1}$ | fwhh<br>/ $\text{cm}^{-1}$ | $A_{991}$ |          |
| 0.0376                                | 980.78                       | 11.50                      | 73005     | 991.0                        | 11.6                       | 24003     | 0.247    |
| 0.0189                                | 980.70                       | 11.49                      | 37388     | 990.8                        | 11.7                       | 12052     | 0.244    |
| 0.00754                               | 980.55                       | 11.20                      | 15234     | 990.8                        | 11.6                       | 4547      | 0.230    |
| 0.00377                               | 980.45                       | 11.00                      | 7755      | 990.4                        | 12.1                       | 2154      | 0.217    |
| 0.00189                               | 980.38                       | 10.40                      | 3920      | 990.3                        | 12.1                       | 999       | 0.203    |
| 0.000943                              | 980.35                       | 9.93                       | 1994      | 990.2                        | 12.3                       | 422       | 0.175    |
| 0.000264                              | 980.32                       | 9.62                       | 624       | 990.2                        | 12.1                       | 75        | 0.107    |

**Table S2.** Raman data of a 0.0098 molL<sup>-1</sup> La<sub>2</sub>(SO<sub>4</sub>)<sub>3</sub> solution as a function of temperature. The band parameter of the three component bands of the  $\nu_1$ -SO<sub>4</sub><sup>2-</sup> band profile are given.

| Temperature /°C | Band component 1                   |                           |                                 | Band component 2                   |                           |                                 | Band component 3                |                           |                                 |
|-----------------|------------------------------------|---------------------------|---------------------------------|------------------------------------|---------------------------|---------------------------------|---------------------------------|---------------------------|---------------------------------|
|                 | $\tilde{\nu}$<br>/cm <sup>-1</sup> | fwhh<br>/cm <sup>-1</sup> | Integrated<br>band<br>intensity | $\tilde{\nu}$<br>/cm <sup>-1</sup> | Fwhh<br>/cm <sup>-1</sup> | Integrated<br>band<br>intensity | $\tilde{\nu}$ /cm <sup>-1</sup> | Fwhh<br>/cm <sup>-1</sup> | Integrated<br>band<br>intensity |
| 23              | 980.0                              | 9.45                      | 930                             | 983.1                              | 8,9                       | 357                             | 991.2                           | 10.0                      | 319                             |
| 24              | 979.6                              | 9.45                      | 920                             | 982.8                              | 9.0                       | 352                             | 991.0                           | 10.0                      | 321                             |
| 50              | 978.3                              | 12.0                      | 910                             | 980.7                              | 9.0                       | 204                             | 989.8                           | 10.2                      | 391                             |
| 75              | 977.1                              | 12.4                      | 778.5                           | 979.3                              | 9.2                       | 171                             | 988.6                           | 11.2                      | 469.5                           |
| 98              | 974.4                              | 13.4                      | 626.7                           | 978.6                              | 9.1                       | 134                             | 987.5                           | 12.4                      | 557                             |
